# Supplementary material for: Metatranscriptome Analysis of Fig Flowers Provides Insights into Potential Mechanisms for Mutualism Stability and Gall Induction
Source: PubMed Central journal article supplement (PMC4474661; doi:10.1371/journal.pone.0130745), 2015-06-19

Supplemental Figure 1 – Venn diagram displaying the number of assembled transcripts shared between samples.

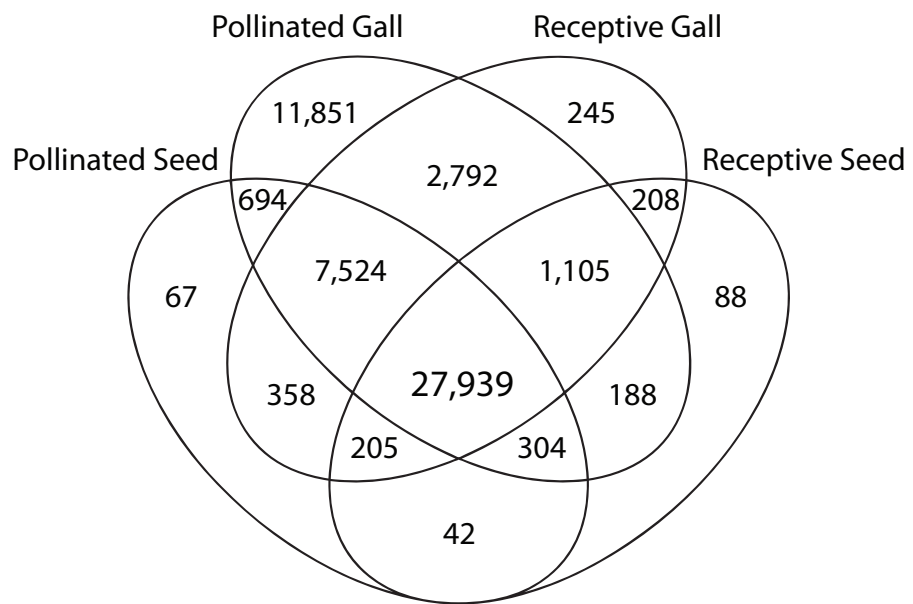

Supplement: pone.0130745.s001.pdf [file pone.0130745.s001.pdf]
